# Supplementary material for: Solvent polarity mediates phytochemical yield and antioxidant capacity of Isatis tinctoria
Source: PeerJ. 2019 Oct 9;7:e7857. doi: 10.7717/peerj.7857 (PMC6790100; doi:10.7717/peerj.7857)
Supplement: Supplemental Information 1 [file peerj-07-7857-s001.xlsx]

## Sheet: TPC
Read 1
														TPC Average
	1	2	3	4	5	6	7	8	9	10	11	12			1	2	3	4	5	6	7	8	9	10	11	12																TPC Branches
A	1.248	0.851	0.635	0.459	0.66	0.852	1.019	0.989	0.917	0.436	1.02	0.998	630	A	1.2505	0.8535	0.633	0.459	0.662	0.8535	1.02	0.9905	0.919	0.4365	1.022	1									Gallic acid equivanent (GAE)µg/mg of extract							Extracts of branches	Average	Std		E	F	E	D
B	1.262	1.464	1.485	0.834	0.65	0.404	0.163	0.608	0.976	1.287	1.507	0.312	630	B	1.263	1.467	1.487	0.8355	0.65	0.404	0.163	0.609	0.9775	1.289	1.5095	0.312										Branches	Flowers	Leaves	Roots			H	59.9537	2.41334		H	C	EA	A
C	1.272	1.018	0.856	1.129	1.325	1.279	0.888	0.728	0.377	1.114	1.042	1.382	630	C	1.2745	1.02	0.857	1.131	1.327	1.2815	0.8875	0.728	0.377	1.1155	1.043	1.384								1	H	59.6611	14.69	33.9762	43.6193			C	41.3754	1.19003		59.9537	41.3754	57.0469	76.8999
D	1.443	0.54	1.403	1.396	1.081	1.593	1.152	1.027	0.864	0.595	0.484	1.222	630	D	1.445	0.539	1.4025	1.398	1.0825	1.595	1.154	1.029	0.8655	0.595	0.484	1.2235								2	C	41.3663	36.4095	65.6092	53.6229			EA	57.0469	2.9335
E	0.752	0.731	1.167	0.627	0.894	0.477	1.371	1.053	0.112	0.111	0.121	0.122	630	E	0.753	0.733	1.1685	0.6285	0.8945	0.4775	1.3725	1.055	2.774											3	EA	57.0476	58.5797	79.9838	78.0011			A	76.8999	2.12007
F	0.101	0.135	0.091	0.063	0.071	0.076	0.051	0.061	0.061	0.062	0.06	0.101	630	F																				4	A	76.9196	54.8846	100.532	110.265			E	76.7909	1.60737
G													630																					5	E	76.9196	75.2974	115.492	92.7361			M	112.605	2.45134		57.7	40.19	54.113	74.77
H													630																					6	M	112.698	134.012	119.593	104.001			W	92.7975	1.23389		59.6611	41.3663	57.0476	76.9196
																																		7	W	91.925	88.0948	93.9978	67.8623			H:EA	39.4528	0.50971		62.5	42.57	59.98	79.01
Read 2																																		8	H:EA	39.3385	28.1182	48.5761	56.642			H:E	114.062	2.83742
														Ug/ml																				9	H:E	113.825	77.235	97.5577	123.693			M:C	92.0934	1.98253
	1	2	3	4	5	6	7	8	9	10	11	12			1	2	3	4	5	6	7	8	9	10	11	12								10	M:C	92.1053	114.861	126.397	80.6146			M:EA	133.064	3.35156
A	1.253	0.856	0.631	0.459	0.664	0.855	1.021	0.992	0.921	0.437	1.024	1.002	630	A		30.7678	22.819	16.5465	23.8645	30.7678	36.77	35.7066	33.1291	15.7354	36.8421	36.049								11	M:EA	132.21	101.929	143.745	95.0793			M:A	91.1475	1.89124
B	1.264	1.47	1.489	0.837	0.65	0.404	0.163	0.61	0.979	1.291	1.512	0.312	630	B	45.5299	52.8839	53.6049	30.119	23.4319	14.5638	5.87599	21.9539	35.2379	46.4672	54.416	11.2473								12	M:A	90.1226	91.925	125.991	43.0335			A:W	82.8609	1.89029
C	1.277	1.022	0.858	1.133	1.329	1.284	0.887	0.728	0.377	1.117	1.044	1.386	630	C	45.9445	36.77	30.894	40.7714	47.8371	46.1968	31.9935	26.2437	13.5905	40.2127	37.5991	49.8919								13	A:W	82.8226	136.04	130.227	105.308			M:W	89.8688	3.20277
D	1.447	0.538	1.402	1.4	1.084	1.597	1.156	1.031	0.867	0.595	0.484	1.225	630	D	52.0908	19.4304	50.5588	50.3965	39.0231	57.4982	41.6006	37.0944	31.2004	21.4492	17.4477	44.106								14	M:W	89.2664	116.168	124.73	66.0598
E	0.754	0.735	1.17	0.63	0.895	0.478	1.374	1.057	0.112	0.111	0.122	0.122	630	E	27.1449	26.4239	42.1233	22.6568	32.2459	17.2134	49.4773	38.0317	100																250			TPC Flowers	Average	Std
F	0.101	0.135	0.092	0.063	0.072	0.076	0.051	0.061	0.061	0.061	0.063	0.101	630	F																												H	15.8997	2.7157
G													630																													C	36.1365	3.0093		h	g	f	f
H													630																													EA	59.321	2.71538		H	C	EA	A
														Gallic acid equivanent (GAE)µg/mg of extract																												A	55.1815	2.01646		19.01	33	57.0532	53.33
															1	2	3	4	5	6	7	8	9	10	11	12									Branches Extracts	Replica 1	Replica 2	Replica 3	Average	Std		E	75.6158	2.4605		14.69	36.4095	58.5797	54.8846
														A	#VALUE!	76.9196	57.0476	41.3663	59.6611	76.9196	91.925	89.2664	82.8226	39.3385	92.1053	90.1226									n- hexan	57.7	59.6611	62.5	59.9537	2.41334		M	134.352	3.50087		13.999	39	62.33	57.33
														B	113.825	132.21	134.012	75.2974	58.5797	36.4095	14.69	54.8846	88.0948	116.168	136.04	28.1182									Chloroform	40.19	41.3663	42.57	41.3754	1.19003		W	88.4976	2.6451
														C	114.861	91.925	77.235	101.929	119.593	115.492	79.9838	65.6092	33.9762	100.532	93.9978	124.73									Ethyl acetate	54.113	57.0476	59.98	57.0469	2.9335		H:EA	28.5927	2.96858
														D	130.227	48.5761	126.397	125.991	97.5577	143.745	104.001	92.7361	78.0011	53.6229	43.6193	110.265									Acetone	74.77	76.9196	79.01	76.8999	2.12007		H:E	77.0917	3.03254
														E	67.8623	66.0598	105.308	56.642	80.6146	43.0335	123.693	95.0793	250												Ethanol	75.123	76.9196	78.33	76.7909	1.60737		M:C	115.427	2.04945
														F																					methanol	110.108	112.698	115.008	112.605	2.45134		M:EA	102.116	3.12423
														Gallic acid equivanent (GAE)µg/mg of extract																					Water	89. 89	91.925	93.67	92.7975	1.23389		M:A	92.315	2.54253
																		WB	WF	WL	WR														n- hexan :Ethyl acetate	39.01	39.3385	40.01	39.4528	0.50971		A:W	136.123	3.16582
														1	n- hexan			59.6611	14.69	33.9762	43.6193														Ethanol : n- hexan	111.35	113.825	117.01	114.062	2.83742		M:W	116.129	2.7802
														2	Chloroform			41.3663	36.4095	65.6092	53.6229							Effect of solvents Total Phenolics Contents in combination							Methanol : Chloroform	90.105	92.1053	94.07	92.0934	1.98253
														3	Ethyl acetate			57.0476	58.5797	79.9838	78.0011							Solvents	Branches	Flowers	leaves	Roots			Methanol : Ethyl acetate	130.222	132.21	136.76	133.064	3.35156
														4	Acetone			76.9196	54.8846	100.532	110.265							n- hexan :Ethyl acetate	-	-	-	-			Methanol : Acetone	93.33	90.1226	89.99	91.1475	1.89124		TPC Leaves	Average	Std		I	G	F	E
														5	Ethanol			76.9196	75.2974	115.492	92.7361							n- hexan : Ethanol	+	+	-	+			Acetone:Water	84.77	82.8226	80.99	82.8609	1.89029		H	34.2921	2.57457		H	C	EA	A
														6	methanol			112.698	134.012	119.593	104.001							Methanol : Chloroform	-	-	+	-			Methanol:Water	93.33	89.2664	87.01	89.8688	3.20277		C	66.0531	2.96998		31.89	69.22	82.99	105
														7	Water			91.925	88.0948	93.9978	67.8623							Methanol : Ethyl acetate	+	-	+	-										EA	80.3213	2.51703		33.9762	65.6092	79.9838	100.532
														8	n- hexan :Ethyl acetate			39.3385	28.1182	48.5761	56.642							Methanol : Acetone	-	-	+	-			Flowers Extracts	Replica 1	Replica 2	Replica 3	Average	Std		A	100.861	3.98519		37.01	63.33	77.99	97.05
														9	Ethanol : n- hexan			113.825	77.235	97.5577	123.693							Acetone:Water	-	+	+	-	`		n- hexan	19.01	14.69	13.999	15.8997	2.7157		E	115.274	2.19314
														10	Methanol : Chloroform			92.1053	114.861	126.397	80.6146							Methanol:Water	-	-	+	-			Chloroform	33	36.4095	39	36.1365	3.0093		M	120.389	2.84137
														11	Methanol : Ethyl acetate			132.21	101.929	143.745	95.0793														Ethyl acetate	57.0532	58.5797	62.33	59.321	2.71538		W	94.0056	3.02251
														12	Methanol : Acetone			90.1226	91.925	125.991	43.0335														Acetone	53.33	54.8846	57.33	55.1815	2.01646		H:EA	50.1647	5.24569
														13	Acetone:Water			82.8226	136.04	130.227	105.308														Ethanol	73.33	75.2974	78.22	75.6158	2.4605		H:E	97.7822	2.90103
														14	Methanol:Water			89.2664	116.168	124.73	66.0598														methanol	138.01	134.012	131.033	134.352	3.50087		M:C	126.466	3.05058
																					250														Water	91.321	88.0948	86.077	88.4976	2.6451		M:EA	144.133	2.9133
																																			n- hexan :Ethyl acetate	31.77	28.1182	25.89	28.5927	2.96858		M:A	125.986	2.9965
																																			Ethanol : n- hexan	80.05	77.235	73.99	77.0917	3.03254		A:W	130.186	2.83637
																																			Methanol : Chloroform	117.7	114.861	113.72	115.427	2.04945		M:W	124.959	1.9386
																																			Methanol : Ethyl acetate	105.33	101.929	99.09	102.116	3.12423
																																			Methanol : Acetone	95.03	91.925	89.99	92.315	2.54253		TPC Roots	Average	Std
																																			Acetone:Water	133	136.04	139.33	136.123	3.16582		H	44.5804	3.05363
																																			Methanol:Water	113.33	116.168	118.89	116.129	2.7802		C	54.133	2.43834		G	F	D	B
																																										EA	78.0742	2.76649		H	C	EA	A
																																										A	110.136	2.08639		47.999	56.786	75.345	112.154
																																			Leaves Extracts	Replica 1	Replica 2	Replica 3	Average	Std		E	92.9667	2.02655		43.6193	53.6229	78.0011	110.265
																																			n- hexan	31.89	33.9762	37.01	34.2921	2.57457		M	104.664	3.0619		42.123	51.99	80.8765	107.988
																																			Chloroform	69.22	65.6092	63.33	66.0531	2.96998		W	68.3268	2.80202
																																			Ethyl acetate	82.99	79.9838	77.99	80.3213	2.51703		H:EA	57.1809	2.71215
																																			Acetone	105	100.532	97.05	100.861	3.98519		H:E	124.039	3.24532				N Mean Grouping
																																			Ethanol	117.35	115.492	112.98	115.274	2.19314		M:C	81.2052	2.54933				H:E 3 124.039 A
																																			methanol	118.03	119.593	123.543	120.389	2.84137		M:EA	95.4274	2.63878				A 3 110.136 B
																																			Water	90.987	93.9978	97.032	94.0056	3.02251		M:A	43.7782	3.23542				A:W 3 105.799 B
																																			n- hexan :Ethyl acetate	56.0211	48.5761	45.897	50.1647	5.24569		A:W	105.799	3.28413				M 3 104.664 B
																																			Ethanol : n- hexan	95	97.5577	100.789	97.7822	2.90103		M:W	66.49	3.73666				M:EA 3 95.427 C
																																			Methanol : Chloroform	129.55	126.397	123.45	126.466	3.05058								E 3 92.967 C
																																			Methanol : Ethyl acetate	141.432	143.745	147.22	144.133	2.9133								M:C 3 81.205 D
																																			Methanol : Acetone	122.987	125.991	128.98	125.986	2.9965								EA 3 78.074 D
																																			Acetone:Water	127.33	130.227	133.002	130.186	2.83637								W 3 68.327 E
																																			Methanol:Water	127.002	124.73	123.145	124.959	1.9386								M:W 3 66.490 E
																																																H:EA 3 57.181 F
																																			roots extracts	Replica 1	Replica 2	Replica 3	Average	Std								C 3 54.133 F
																																			n- hexan	47.999	43.6193	42.123	44.5804	3.05363								H 3 44.580 G
																																			chloroform	56.786	53.6229	51.99	54.133	2.43834								M:A 3 43.778 G
																																			ethyl acetate	75.345	78.0011	80.8765	78.0742	2.76649
																																			acetone	112.154	110.265	107.988	110.136	2.08639
																																			ethanol	91.0653	92.7361	95.0987	92.9667	2.02655
																																			methanol	108.003	104.001	101.988	104.664	3.0619
																																			water	71.332	67.8623	65.786	68.3268	2.80202
																																			n- hexan :ethyl acetate	60.122	56.642	54.7786	57.1809	2.71215
																																			ethanol : n- hexan	120.98	123.693	127.443	124.039	3.24532
																																			methanol : chloroform	83.998	80.6146	79.003	81.2052	2.54933
																																			methanol : ethyl acetate	98.223	95.0793	92.98	95.4274	2.63878
																																			methanol : acetone	47.321	43.0335	40.98	43.7782	3.23542
																																			acetone:water	109.301	105.308	102.788	105.799	3.28413
																																			methanol:water	70.4231	66.0598	62.987	66.49	3.73666
[truncated: 10 more columns]

## Sheet: correlation 
																	TPC Flowers	Average	Std				Flowers												Leaves													Roots
TPC Branches					Branches												H	15.8997	2.7157					TPC	TFC	TRP	TAC			TPC Leaves	Average	Std				TPC	TFC	TRP	TAC					TPC Roots	Average	Std			TPC
Extracts of branches	Average	Std				TPC	TFC	TRP	TAC								C	36.1365	3.0093				H	15.8997	14.4052	21.4015	62.8999			H	34.2921	2.57457			H	34.2921	32.2356	48.2529	122.607					H	44.5804	3.05363		H	44.5804
H	59.9537	2.41334			H	59.9537	72.0328	84.5393	168.916								EA	59.321	2.71538				C	36.1365	70.6488	51.9186	116.736			C	66.0531	2.96998			C	66.0531	143.497	93.036	147.802					C	54.133	2.43834		C	54.133
C	41.3754	1.19003			C	41.3754	84.1283	58.6189	156.408								A	55.1815	2.01646				EA	59.321	75.9377	83.4344	193.145			EA	80.3213	2.51703			EA	80.3213	82.8677	113.204	122.125					EA	78.0742	2.76649		EA	78.0742
EA	57.0469	2.9335			EA	57.0469	90.6691	80.9351	178.302								E	75.6158	2.4605				A	55.1815	47.687	78.0291	137.556			A	100.861	3.98519			A	100.861	66.8073	142.256	183.912					A	110.136	2.08639		A	110.136
A	76.8999	2.12007			A	76.8999	72.5761	108.996	218.155								M	134.352	3.50087				E	75.6158	78.9047	106.409	135.151			E	115.274	2.19314			E	115.274	71.6448	163.188	168.245					E	92.9667	2.02655		E	92.9667
E	76.7909	1.60737			E	76.7909	29.8859	108.87	135.221								W	88.4976	2.6451				M	134.352	74.4542	189.717	202.902			M	120.389	2.84137			M	120.389	59.8607	169.16	167.545					M	104.664	3.0619		M	104.664
M	112.605	2.45134			M	112.605	27.5649	159.543	159.375								H:EA	28.5927	2.96858				W	88.4976	17.6302	124.142	131.435			W	94.0056	3.02251			W	94.0056	15.149	132.922	126.35					W	68.3268	2.80202		W	68.3268
W	92.7975	1.23389			W	92.7975	22.1448	130.052	145.389								H:E	77.0917	3.03254				H:EA	28.5927	35.69	40.6146	82.2314			H:EA	50.1647	5.24569			H:EA	50.1647	71.9503	69.5333	142.939					H:EA	57.1809	2.71215		H:EA	57.1809
H:EA	39.4528	0.50971			H:EA	39.4528	57.1982	59.3752	126.315								M:C	115.427	2.04945				H:E	77.0917	78.8402	108.986	201.944			H:E	97.7822	2.90103			H:E	97.7822	83.0894	138.48	171.139					H:E	124.039	3.24532		H:E	124.039
H:E	114.062	2.83742			H:E	114.062	41.6297	160.966	208.436								M:EA	102.116	3.12423				M:C	115.427	78.4367	161.969	201.35			M:C	126.466	3.05058			M:C	126.466	77.3145	178.922	192.814					M:C	81.2052	2.54933		M:C	81.2052
M:C	92.0934	1.98253			M:C	92.0934	61.3661	130.395	131.103								M:A	92.315	2.54253				M:EA	102.116	84.4997	144.135	217.412			M:EA	144.133	2.9133			M:EA	144.133	50.7307	203.271	192.743					M:EA	95.4274	2.63878		M:EA	95.4274
M:A	133.064	3.35156			M:A	133.064	28.8243	186.912	143.939								A:W	136.123	3.16582				M:A	92.315	66.1818	129.874	172.81			M:A	125.986	2.9965			M:A	125.986	63.2278	178.316	162.975					M:A	43.7782	3.23542		M:A	43.7782
M:A	91.1475	1.89124			M:A	91.1475	34.1932	127.395	112.027								M:W	116.129	2.7802				A:W	136.123	40.253	192.375	173.406			A:W	130.186	2.83637			A:W	130.186	34.2867	183.824	163.199					A:W	105.799	3.28413		A:W	105.799
A:W	82.8609	1.89029			A:W	82.8609	27.5833	116.989	160.156														M:W	116.129	31.3521	164.316	152.849			M:W	124.959	1.9386			M:W	124.959	18.8473	176.347	178.302					M:W	66.49	3.73666		M:W	66.49
M:W	89.8688	3.20277			M:W	89.8688	16.7616	126.434	145.833
																	TFC Flowers	Average	Std						flowers Correlations: TPC, TFC, TRP, TAC
TFC Branches	Average	Std															H	14.4052	2.56358											TFC Leaves	Average	Std			Leaves Correlations: TPC, TFC, TRP, TAC									TFC Roots	Average	Std		Correlations: TPC, TFC, TRP, TAC (Roots)
H	72.0328	3.00406				Branches Correlations: TPC, TFC, TRP, TAC											C	70.6488	2.56358							TPC	TFC	TRP		H	32.2356	3.35544												H	57.5017	2.48976
C	84.1283	2.83996															EA	75.9377	2.56358						TFC	0.255				C	143.497	3.35544				TPC	TFC	TRP						C	57.2763	2.57725			TPC
EA	90.6691	2.78532					TPC	TFC	TRP								A	47.687	2.56358							0.38				EA	82.8677	3.35544			TFC	-0.242								EA	80.219	2.54695		TFC	0.14
A	72.5761	1.71985				TFC	-0.667										E	78.9047	2.56358											A	66.8073	3.35544				0.404								A	81.3571	2.84275			0.634
E	29.8859	3.03408					0.009										M	74.4542	2.56358						TRP	1	0.256			E	71.6448	3.35544												E	44.0304	2.46774
M	27.5649	2.26828															W	17.6302	2.56358							0	0.376			M	59.8607	3.78002			TRP	1	-0.242							M	20.5188	4.66989		TRP	1
W	22.1448	1.7325				TRP	1	-0.668									H:EA	35.69	2.56358											W	15.149	3.87239				0	0.405							W	12.7343	2.63293			0
H:EA	57.1982	1.78175					0	0.009									H:E	78.8402	2.56358						TAC	0.742	0.71	0.742		H:EA	71.9503	2.66755												H:EA	62.9588	2.8418
H:E	41.6297	2.42931															M:C	78.4367	1.99501							0.002	0.004	0.002		H:E	83.0894	2.67227			TAC	0.761	0.039	0.76						H:E	78.122	2.96907		TAC	0.59
M:C	61.3661	3.07791				TAC	0.049	0.367	0.049								M:EA	84.4997	1.99501						Cell Contents: Pearson correlation P-Value					M:C	77.3145	2.84989				0.002	0.894	0.002						M:C	38.9984	5.27128			0.026
M:A	28.8243	3.7372					0.868	0.197	0.868								M:A	66.1818	1.99501											M:EA	50.7307	3.90875			Cell Contents: Pearson correlation P-Value									M:EA	28.7078	2.22805		Cell Contents: Pearson correlation P-Value
M:A	34.1932	2.96088				Cell Contents: Pearson correlation P-Value											A:W	40.253	1.99501											M:A	63.2278	2.65563												M:A	27.1864	2.39108
A:W	27.5833	2.75337															M:W	31.3521	1.99501											A:W	34.2867	1.33079												A:W	15.7533	3.40023
M:W	16.7616	3.46302																												M:W	18.8473	2.81558												M:W	8.61598	2.82575
FRP Branches	Average	Std															TRP Flowers	Average	Std
H	84.5393	2.01337															H	21.4015	2.786											TRP Leaves	Average	Std												TRP Roots	Average	Std
C	58.6189	2.83988															C	51.9186	0.93778											H	48.2529	2.62499												H	63.6513	1.7988
EA	80.9351	2.35569															EA	83.4344	1.35865											C	93.036	2.13393												C	76.3128	2.00278
A	108.996	2.40653															A	78.0291	1.77214											EA	113.204	2.56346												EA	110.5	2.35238
E	108.87	2.01312															E	106.409	2.56248											A	142.256	2.52231												A	155.84	1.33279
M	159.543	2.63402															M	189.717	2.09913											E	163.188	2.65658												E	131.511	2.93092
W	130.052	3.28578															W	124.142	2.01515											M	169.16	2.18334												M	147.291	2.18723
H:EA	59.3752	9.42572															H:EA	40.6146	2.83085											W	132.922	0.900303												W	95.9468	1.99675
H:E	160.966	3.1721															H:E	108.986	2.0669											H:EA	69.5333	3.216												H:EA	80.4408	1.7126
M:C	130.395	2.33876															M:C	161.969	3.17072											H:E	138.48	3.00643												H:E	175.126	2.14583
M:A	186.912	3.00386															M:EA	144.135	1.11962											M:C	178.922	1.36383												M:C	114.142	1.95265
M:A	127.395	2.22933															M:A	129.874	0.893584											M:EA	203.271	2.83573												M:EA	134.506	2.17537
A:W	116.989	2.00651															A:W	192.375	2.51784											M:A	178.316	2.29962												M:A	61.0052	2.45465
M:W	126.434	3.62285															M:W	164.316	0.60134											A:W	183.824	2.78287												A:W	150.176	2.73703
																														M:W	176.347	2.11051												M:W	93.2923	2.49977
TAC Branches	Average	Std
H	168.916	3.17516															TAC Flowers	Average	Std
C	156.408	2.51008															H	62.8999	2.44441											TAC Leaves	Average	Std												TAC Roots	Average	Std
EA	178.302	3.07318															C	116.736	2.37534											H	122.607	2.3091												H	180.642	2.72332
A	218.155	2.93543															EA	193.145	2.69156											C	147.802	2.53324												C	120.676	4.19293
E	135.221	2.72659															A	137.556	1.30448											EA	122.125	1.02301												EA	142.089	2.28871
M	159.375	3.70294															E	135.151	1.95091											A	183.912	3.78688												A	225.841	1.06924
W	145.389	2.41924															M	202.902	2.50586											E	168.245	2.93786												E	177.558	2.54658
H:EA	126.315	2.55152															W	131.435	3.56638											M	167.545	2.70802												M	185.39	2.34647
H:E	208.436	2.73784															H:EA	82.2314	2.54292											W	126.35	2.6181												W	81.3591	3.08652
M:C	131.103	2.0578															H:E	201.944	1.00465											H:EA	142.939	2.94												H:EA	123.68	3.2903
M:A	143.939	3.34735															M:C	201.35	1.59574											H:E	171.139	2.46483												H:E	175.185	2.92348
M:A	112.027	1.22628															M:EA	217.412	0.518043											M:C	192.814	2.5394												M:C	148.206	3.05848
A:W	160.156	2.93149															M:A	172.81	2.20956											M:EA	192.743	2.53504												M:EA	173.331	2.94648
M:W	145.833	2.7263															A:W	173.406	2.8553											M:A	162.975	2.30574												M:A	92.4347	2.65637
																	M:W	152.849	2.29091											A:W	163.199	3.17322												A:W	127.285	2.86345
																														M:W	178.302	2.27314												M:W	133.632	2.71081
[truncated: 3 more columns]

## Sheet: TFC
Read 1														TFC Average																						WB	WF	WL	WR			n- hexan
	1	2	3	4	5	6	7	8	9	10	11	12			1	2	3	4	5	6	7	8	9	10	11	12									n- hexan	71.8524	14.2544	31.7982	56.953			Chloroform
A	0.213	0.222	0.705	0.649	0.559	0.564	0.166	0.121	0.124	0.666	0.339	0.302	450	A	0.213	0.222	0.701	0.6515	0.557	0.562	0.166	0.121	0.21	0.438	0.4695	0.262									Chloroform	84.0428	70.4979	143.06	56.953			Ethyl acetate
B	0.421	0.205	0.455	0.567	0.62	0.533	0.055	0.616	0.135	0.243	0.312	0.276	450	B	0.317	0.2135	0.576	0.6105	0.5875	0.5465	0.1105	0.3685	0.1355	0.243	0.312	0.2755									Ethyl acetate	90.4283	75.7869	82.4303	79.6569			Acetone
C	0.609	0.514	0.612	0.658	0.466	0.552	0.644	1.109	0.453	0.518	0.112	0.142	450	C	0.608	0.513	0.61	0.655	0.4655	0.552	0.639	1.109	0.2465	0.5145	0.112	0.142									Acetone	72.4974	47.5361	66.37	81.0759			Ethanol
D	0.263	0.556	0.597	0.487	0.644	0.386	0.152	0.338	0.617	0.441	0.442	0.629	450	D	0.2625	0.557	0.5965	0.486	0.6455	0.3865	0.1525	0.3385	0.6175	0.4415	0.4415	0.6285									Ethanol	28.6378	78.7539	71.2074	43.6662			methanol
E	0.095	0.06	0.114	0.489	0.295	0.209	0.603	0.221	0.04	0.037			450	E	0.0955	0.06	0.114	0.49	0.2955	0.2095	0.6015	0.2215	1.938												methanol	27.4768	74.3034	60.049	19.6723			Water
F	0.7	1.395	1.941	2.99	4.384								450	F																					Water	21.4138	17.4794	14.4479	12.3194			n- hexan :Ethyl acetate
																																			n- hexan :Ethyl acetate	56.5015	35.5392	71.8524	63.2095			Ethanol : n- hexan
Read 2																																			Ethanol : n- hexan	40.8927	78.6894	83.2688	77.5929			Methanol : Chloroform
	1	2	3	4	5	6	7	8	9	10	11	12			1	2	3	4	5	6	7	8	9	10	11	12									Methanol : Chloroform	60.565	78.4314	76.9479	38.1192			Methanol : Ethyl acetate
A	0.213	0.222	0.697	0.654	0.555	0.56	0.166	0.121	0.296	0.21	0.6	0.222	450	A	10.9907	11.4551	36.1713	33.6171	28.741	28.999	8.56553	6.24355	10.8359	22.6006	24.226	13.5191									Methanol : Ethyl acetate	27.5413	84.4943	49.8581	28.5733			Methanol : Acetone
B	0.213	0.222	0.697	0.654	0.555	0.56	0.166	0.121	0.136	0.243	0.312	0.275	450	B	16.3571	11.0165	29.7214	31.5015	30.3148	28.1992	5.70175	19.0144	6.99174	12.5387	16.0991	14.2157									Methanol : Acetone	33.7977	66.1765	62.6935	27.0253			Acetone:Water
C	0.607	0.512	0.608	0.652	0.465	0.552	0.634	1.109	0.04	0.511	0.112	0.142	450	C	31.3725	26.4706	31.4757	33.7977	24.0196	28.483	32.9721	57.2239	12.7193	26.548	5.77915	7.32714									Acetone:Water	27.0898	40.2477	33.8622	14.7059			Methanol:Water
D	0.262	0.558	0.596	0.485	0.647	0.387	0.153	0.339	0.618	0.442	0.441	0.628	450	D	13.5449	28.741	30.7792	25.0774	33.3075	19.9432	7.86894	17.4665	31.8627	22.7812	22.7812	32.4303									Methanol:Water	15.6089	31.3467	18.3179	7.73994
E	0.096	0.06	0.114	0.491	0.296	0.21	0.6	0.222	0.041	0.038			450	E	4.92776	3.09598	5.88235	25.2838	15.2477	10.8101	31.0372	11.4293	100	0	0	0
F	0.682	1.391	1.936	2.976	4.364								450	F
														Quarcetine equivalent (QE)µg/mg extract																												TFC Branches	Average	Std
															1	2	3	4	5	6	7	8	9	10	11	12									Extracts of branches	Replica 1	Replica 2	Replica 3	Average	Std		H	72.0328	3.00406			B	A	A
														A	27.4768	28.6378	90.4283	84.0428	71.8524	72.4974	21.4138	15.6089	27.0898	56.5015	60.565	33.7977									n- hexan	69.123	71.8524	75.123	72.0328	3.00406		C	84.1283	2.83996			H	C	EA
														B	40.8927	27.5413	74.3034	78.7539	75.7869	70.4979	14.2544	47.5361	17.4794	31.3467	40.2477	35.5392									Chloroform	87.01	84.0428	81.332	84.1283	2.83996		EA	90.6691	2.78532		Replica 1	69.123	87.01	93.567
		0.7	1.395	1.941	2.99	4.384	2.282							C	78.4314	66.1765	78.6894	84.4943	60.049	71.2074	82.4303	143.06	31.7982	66.37	14.4479	18.3179									Ethyl acetate	93.567	90.4283	88.012	90.6691	2.78532		A	72.5761	1.71985		Replica 2	71.8524	84.0428	90.4283
														D	33.8622	71.8524	76.9479	62.6935	83.2688	49.8581	19.6723	43.6662	79.6569	56.953	56.953	81.0759									Acetone	70.897	72.4974	74.334	72.5761	1.71985		E	29.8859	3.03408		Replica 3	75.123	81.332	88.012
														E	12.3194	7.73994	14.7059	63.2095	38.1192	27.0253	77.5929	28.5733	250												Ethanol	33.345	28.6378	27.675	29.8859	3.03408		M	27.5649	2.26828
														Quarcetine equivalent (QE)µg/mg of extract																					methanol	25.342	27.4768	29.876	27.5649	2.26828		W	22.1448	1.7325
																		WB	WF	WL	WR														Water	20.8976	21.4138	24.123	22.1448	1.7325		H:EA	57.1982	1.78175
														1	n- hexan			71.8524	14.2544	31.7982	56.953														n- hexan :Ethyl acetate	55.87	56.5015	59.223	57.1982	1.78175		H:E	41.6297	2.42931
														2	Chloroform			84.0428	70.4979	143.06	56.953														Ethanol : n- hexan	39.6543	40.8927	44.3422	41.6297	2.42931		M:C	61.3661	3.07791
														3	Ethyl acetate			90.4283	75.7869	82.4303	79.6569														Methanol : Chloroform	64.7654	60.565	58.768	61.3661	3.07791		M:EA	28.8243	3.7372
														4	Acetone			72.4974	47.5361	66.37	81.0759														Methanol : Ethyl acetate	33.034	27.5413	25.8976	28.8243	3.7372		M:A	34.1932	2.96088
														5	Ethanol			28.6378	78.7539	71.2074	43.6662							Effect of solvents Total Flavonoid Contents in combination							Methanol : Acetone	31.45	33.7977	37.332	34.1932	2.96088		A:W	27.5833	2.75337
														6	methanol			27.4768	74.3034	60.049	19.6723							Solvents	Branches	Flowers	leaves	Roots			Acetone:Water	30.55	27.0898	25.11	27.5833	2.75337		M:W	16.7616	3.46302
														7	Water			21.4138	17.4794	14.4479	12.3194							n- hexan :Ethyl acetate	-	-	-	-			Methanol:Water	20.654	15.6089	14.022	16.7616	3.46302
														8	n- hexan :Ethyl acetate			56.5015	35.5392	71.8524	63.2095							n- hexan : Ethanol	-	0	+	+
														9	Ethanol : n- hexan			40.8927	78.6894	83.2688	77.5929							Methanol : Chloroform	-	+	-	-										TFC Flowers	Average	Std			g	bc	b
														10	Methanol : Chloroform			60.565	78.4314	76.9479	38.1192							Methanol : Ethyl acetate	-	+	-	-			Extract of flowers	Replica 1	Replica 2	Replica 3	Average	Std		H	14.4052	2.56358			H	C	EA
														11	Methanol : Ethyl acetate			27.5413	84.4943	49.8581	28.5733							Methanol : Acetone	-	-	-	-			n- hexan	18.01	14.2544	11.9204	14.7283	3.07234		C	70.6488	2.56358		Replica 1	18.01	77.03	77
														12	Methanol : Acetone			33.7977	66.1765	62.6935	27.0253							Acetone:Water	-	-	-	-			Chloroform	77.03	70.4979	68.1639	71.8973	4.5957		EA	75.9377	2.56358		Replica 2	14.2544	70.4979	75.7869
														13	Acetone:Water			27.0898	40.2477	33.8622	14.7059							Methanol:Water	-	-	-	-			Ethyl acetate	77	75.7869	73.4529	75.4133	1.80283		A	47.687	2.56358		Replica 3	11.9204	68.1639	73.4529
														14	Methanol:Water			15.6089	31.3467	18.3179	7.73994														Acetone	50.3226	47.5361	45.2021	47.687	2.56358		E	78.9047	2.56358
																					250														Ethanol	82	78.7539	76.4199	79.0579	2.80246		M	74.4542	2.56358
																																			methanol	77.9	74.3034	71.9694	74.7243	2.98761		W	17.6302	2.56358
																																			Water	21.456	17.4794	15.1454	18.0269	3.19075		H:EA	35.69	2.56358
																																			n- hexan :Ethyl acetate	38.44	35.5392	33.2052	35.7281	2.6225		H:E	78.8402	2.56358
																																			Ethanol : n- hexan	81.4759	78.6894	76.3554	78.8402	2.56358		M:C	78.4367	1.99501
																																			Methanol : Chloroform	77	78.4314	80.4344	78.6219	1.7251		M:EA	84.4997	1.99501
																																			Methanol : Ethyl acetate	81	84.4943	86.4973	83.9972	2.78217		M:A	66.1818	1.99501
																																			Methanol : Acetone	65	66.1765	68.1795	66.452	1.60754		A:W	40.253	1.99501
																																			Acetone:Water	39	40.2477	42.2507	40.4995	1.6399		M:W	31.3521	1.99501
																																			Methanol:Water	30	31.3467	33.3497	31.5655	1.68555
																																										TFC Leaves	Average	Std			h	a	b
																																			Extract of leaves	Replica 1	Replica 2	Replica 3	Average	Std		H	32.2356	3.35544			H	C	EA
																																			n- hexan	36	31.7982	29.1202	32.3062	3.46789		C	143.497	3.35544		Replica 1	36	146	84
																																			Chloroform	146	143.06	140.382	143.147	2.81009		EA	82.8677	3.35544		Replica 2	31.7982	143.06	82.4303
																																			Ethyl acetate	84	82.4303	79.7523	82.0609	2.14779		A	66.8073	3.35544		Replica 3	29.1202	140.382	79.7523
																																			Acetone	70	66.37	63.692	66.6873	3.16597		E	71.6448	3.35544
																																			Ethanol	73	71.2074	68.5294	70.9123	2.24985		M	59.8607	3.78002
																																			methanol	58	60.049	63.543	60.5307	2.80271		W	15.149	3.87239
																																			Water	21	14.4479	11.675	15.7076	4.78844		H:EA	71.9503	2.66755
																																			n- hexan :Ethyl acetate	70	71.8524	74.6654	72.1726	2.34912		H:E	83.0894	2.67227
																																			Ethanol : n- hexan	80	83.2688	85.6675	82.9788	2.84486		M:C	77.3145	2.84989
																																			Methanol : Chloroform	75	76.9479	80.33	77.426	2.69697		M:EA	50.7307	3.90875
																																			Methanol : Ethyl acetate	55.002	49.8581	47.332	50.7307	3.90875		M:A	63.2278	2.65563
																																			Methanol : Acetone	60.88	62.6935	66.11	63.2278	2.65563		A:W	34.2867	1.33079
																																			Acetone:Water	33.22	33.8622	35.778	34.2867	1.33079		M:W	18.8473	2.81558
																																			Methanol:Water	21.89	18.3179	16.334	18.8473	2.81558
																																										TFC Roots	Average	Std
																																			Extract of roots	Replica 1	Replica 2	Replica 3	Average	Std		H	57.5017	2.48976			b	b	a
																																			n- hexan	60.22	56.953	55.332	57.5017	2.48976		C	57.2763	2.57725			H	C	EA
																																			Chloroform	54.876	56.953	60	57.2763	2.57725		EA	80.219	2.54695		Replica 1	60.22	54.876	78
																																			Ethyl acetate	78	79.6569	83	80.219	2.54695		A	81.3571	2.84275		Replica 2	56.953	56.953	79.6569
																																			Acetone	78.6654	81.0759	84.33	81.3571	2.84275		E	44.0304	2.46774		Replica 3	55.332	60	83
																																			Ethanol	41.765	43.6662	46.66	44.0304	2.46774		M	20.5188	4.66989
																																			methanol	25.554	19.6723	16.33	20.5188	4.66989		W	12.7343	2.63293
																																			Water	15.55	12.3194	10.3334	12.7343	2.63293		H:EA	62.9588	2.8418
																																			n- hexan :Ethyl acetate	60	63.2095	65.667	62.9588	2.8418		H:E	78.122	2.96907
																																			Ethanol : n- hexan	75.453	77.5929	81.32	78.122	2.96907		M:C	38.9984	5.27128
																																			Methanol : Chloroform	44.654	38.1192	34.222	38.9984	5.27128		M:EA	28.7078	2.22805
																																			Methanol : Ethyl acetate	31	28.5733	26.55	28.7078	2.22805		M:A	27.1864	2.39108
																																			Methanol : Acetone	29.654	27.0253	24.88	27.1864	2.39108		A:W	15.7533	3.40023
																																			Acetone:Water	19.554	14.7059	13	15.7533	3.40023		M:W	8.61598	2.82575
																																			Methanol:Water	11.776	7.73994	6.332	8.61598	2.82575
[truncated: 12 more columns]

## Sheet: TAC
Read 1	Total antioxidant capacity																														Ascarbic Acid Equivilant(AAE) µg/mg extract
														Average																					WB	WF	WL	WR		TAC Branches	Average	Std			d	e	c	a	g
	1	2	3	4	5	6	7	8	9	10	11	12			1	2	3	4	5	6	7	8	9	10	11	12					1	n- hexan			168.641	62.6956	122.15	180.487		H	168.916	3.17516			H	C	EA	A	E
A	0.71	0.599	0.774	0.697	0.749	0.969	0.641	0.649	0.71	0.552	0.581	0.497	630	A	0.7105	0.6045	0.796	0.699	0.7545	0.9735	0.6485	0.6515	0.714	0.5625	0.586	0.5015					2	Chloroform			156.236	115.78	147.295	120.139		C	156.408	2.51008		Replica 1	165.888	159	175.44	221.332	138
B	0.917	0.636	0.897	0.596	0.841	0.505	0.276	0.613	0.584	0.684	0.764	0.364	630	B	0.931	0.6425	0.905	0.602	0.8625	0.518	0.2805	0.614	0.5845	0.685	0.774	0.3655					3	Ethyl acetate			177.917	192.781	122.374	142.378		EA	178.302	3.07318		Replica 2	168.641	156.236	177.917	217.591	135.114
C	0.888	0.761	0.891	0.958	0.735	0.738	0.536	0.647	0.553	0.813	0.559	0.785	630	C	0.899	0.771	0.903	0.972	0.746	0.75	0.5475	0.659	0.5465	0.824	0.565	0.798					4	Acetone			217.591	137.237	184.175	225.637		A	218.155	2.93543		Replica 3	172.22	153.989	181.55	215.543	132.55
D	0.724	0.636	0.851	0.715	0.766	0.856	0.828	0.788	0.634	0.533	0.803	0.997	630	D	0.7305	0.6395	0.8605	0.7275	0.767	0.8645	0.828	0.792	0.637	0.5375	0.8075	1.0095					5	Ethanol			135.114	134.555	167.635	177.023		E	135.221	2.72659
E	0.361	0.598	0.564	0.549	0.655	0.41	0.778	0.771	4.438	4.482	0.052	0.102	630	E	0.3635	0.6005	0.566	0.552	0.66	0.411	0.7815	0.775	2.237								6	methanol			158.806	202.28	166.741	185.069		M	159.375	3.70294
F	0.037	0.046	0.038	0.037	0.073	0.046	0.037	0.048	0.094	0.079	0.068	0.053	630	F																	7	Water			144.949	130.644	126.285	81.2472		W	145.389	2.41924
G													630																		8	n- hexan :Ethyl acetate			125.726	81.6942	142.937	123.38		H:EA	126.315	2.55152
H													630																		9	Ethanol : n- hexan			208.091	201.833	171.435	174.676		H:E	208.436	2.73784
																															10	Methanol : Chloroform			130.979	200.939	192.333	147.519		M:C	131.103	2.0578
Read 2																															11	Methanol : Ethyl acetate			143.608	217.255	193.228	173.223		M:EA	143.939	3.34735
																															12	Methanol : Acetone			112.092	172.329	162.606	91.8641		M:A	112.027	1.22628
	1	2	3	4	5	6	7	8	9	10	11	12			1	2	3	4	5	6	7	8	9	10	11	12					13	Acetone:Water			159.589	173	163.277	126.509		A:W	160.156	2.93149
A	0.706	0.596	0.769	0.69	0.744	0.961	0.639	0.647	0.708	0.533	0.577	0.495	630	A	63.5226	54.0456	71.1667	62.4944	67.4564	87.0362	57.9794	58.2477	63.8355	50.2906	52.3916	44.8368					14	Methanol:Water			145.619	153.107	178.364	134.22		M:W	145.833	2.7263
B	0.918	0.635	0.894	0.601	0.835	0.502	0.274	0.61	0.584	0.681	0.762	0.363	630	B	83.2365	57.443	80.9119	53.8221	77.1122	46.312	25.0782	54.8949	52.2575	61.2427	69.1998	32.6777
C	0.888	0.758	0.887	0.952	0.735	0.739	0.534	0.644	0.549	0.805	0.559	0.791	630	C	80.3755	68.9316	80.7331	86.9021	66.6965	67.0541	48.9495	58.9182	48.8601	73.6701	50.5141	71.3456
D	0.724	0.626	0.845	0.714	0.764	0.856	0.827	0.787	0.633	0.528	0.786	0.995	630	D	65.3107	57.1748	76.9334	65.0425	68.574	77.291	74.0277	70.8091	56.9513	48.0554	72.1949	90.2548
E	0.357	0.594	0.562	0.54	0.651	0.41	0.771	0.771	4.479	4.469	0.054	0.116	630	E	32.4989	53.688	50.6035	49.3518	59.0076	36.7456	69.8704	69.2892	200	0	0	0																			i	g	c	f	f
F	0.039	0.052	0.04	0.045	0.08	0.058	0.043	0.055	0.11	0.079	0.068	0.056	630	F																		Extracts of branches	Replica 1	Replica 2	Replica 3	Average	Std			TAC Flowers	Average	Std			H	C	EA	A	E
G													630																			n- hexan	165.888	168.641	172.22	168.916	3.17516			H	62.8999	2.44441		Replica 1	60.564	119.44	190.654	138.99	137.33
H													630																			Chloroform	159	156.236	153.989	156.408	2.51008			C	116.736	2.37534		Replica 2	62.6956	115.78	192.781	137.237	134.555
																																Ethyl acetate	175.44	177.917	181.55	178.302	3.07318			EA	193.145	2.69156		Replica 3	65.44	114.987	196	136.44	133.567
Reading 3									4.479	4.469	4.474	2.237																				Acetone	221.332	217.591	215.543	218.155	2.93543			A	137.556	1.30448
														Ascarbic Acid Equivilant(AAE) µg/mg extract																		Ethanol	138	135.114	132.55	135.221	2.72659			E	135.151	1.95091
	1	2	3	4	5	6	7	8	9	10	11	12			1	2	3	4	5	6	7	8	9	10	11	12						methanol	163.33	158.806	155.99	159.375	3.70294			M	202.902	2.50586
A	0.711	0.606	0.804	0.709	0.762	0.982	0.651	0.653	0.716	0.566	0.588	0.502	630	A	158.806	135.114	177.917	156.236	168.641	217.591	144.949	145.619	159.589	125.726	130.979	112.092						Water	143.22	144.949	147.998	145.389	2.41924			W	131.435	3.56638
B	0.932	0.644	0.907	0.601	0.866	0.521	0.282	0.616	0.586	0.686	0.775	0.366	630	B	208.091	143.608	202.28	134.555	192.781	115.78	62.6956	137.237	130.644	153.107	173	81.6942						n- hexan :Ethyl acetate	124.11	125.726	129.11	126.315	2.55152			H:EA	82.2314	2.54292
C	0.901	0.774	0.905	0.973	0.747	0.751	0.548	0.66	0.547	0.826	0.566	0.8	630	C	200.939	172.329	201.833	217.255	166.741	167.635	122.374	147.295	122.15	184.175	126.285	178.364						Ethanol : n- hexan	205.887	208.091	211.33	208.436	2.73784			H:E	201.944	1.00465
D	0.732	0.642	0.862	0.729	0.767	0.865	0.828	0.792	0.637	0.538	0.811	1.014	630	D	163.277	142.937	192.333	162.606	171.435	193.228	185.069	177.023	142.378	120.139	180.487	225.637						Methanol : Chloroform	133.22	130.979	129.11	131.103	2.0578			M:C	201.35	1.59574
E	0.365	0.602	0.567	0.554	0.661	0.411	0.783	0.775	4.552	4.513	0.052	0.101	630	E	81.2472	134.22	126.509	123.38	147.519	91.8641	174.676	173.223	500									Methanol : Ethyl acetate	147.44	143.608	140.77	143.939	3.34735			M:EA	217.412	0.518043
F	0.038	0.047	0.04	0.044	0.076	0.057	0.041	0.054	0.089	0.079	0.068	0.055	630																			Methanol : Acetone	113.22	112.092	110.77	112.027	1.22628			M:A	172.81	2.20956
G													630																			Acetone:Water	157.55	159.589	163.33	160.156	2.93149			A:W	173.406	2.8553
H													630																			Methanol:Water	143.22	145.619	148.66	145.833	2.7263			M:W	152.849	2.29091
														Ascarbic Acid Equivilant(AAE) µg/mg extract
Reading 4																		WB	WF	WL	WR				Effect of solvents combination on Total Antioxidant Capacity in extracts																				G	F	G	B	DE
														1	n- hexan			168.641	62.6956	122.15	180.487				Solvents	Branches	Flowers	leaves	Roots											TAC Leaves	Average	Std			H	C	EA	A	E
	1	2	3	4	5	6	7	8	9	10	11	12		2	Chloroform			156.236	115.78	147.295	120.139				n- hexan :Ethyl acetate	-	-	+	-											H	122.607	2.3091		Replica 1	125.11	150.55	123	180	171.44
A	0.71	0.603	0.788	0.689	0.747	0.965	0.646	0.65	0.712	0.559	0.584	0.501	630	3	Ethyl acetate			177.917	192.781	122.374	142.378				n- hexan : Ethanol	+	+	+	-			Extracts of flowers	Replica 1	Replica 2	Replica 3	Average	Std			C	147.802	2.53324		Replica 2	122.15	147.295	122.374	184.175	167.635
B	0.93	0.641	0.903	0.603	0.859	0.515	0.279	0.612	0.583	0.684	0.773	0.365	630	4	Acetone			217.591	137.237	184.175	225.637				Methanol : Chloroform	-	-	+	-			n- hexan	60.564	62.6956	65.44	62.8999	2.44441			EA	122.125	1.02301		Replica 3	120.56	145.56	121	187.56	165.66
C	0.897	0.768	0.901	0.971	0.745	0.749	0.547	0.658	0.546	0.822	0.564	0.796	630	5	Ethanol			135.114	134.555	167.635	177.023				Methanol : Ethyl acetate	-	+	+	-			Chloroform	119.44	115.78	114.987	116.736	2.37534			A	183.912	3.78688
D	0.729	0.637	0.859	0.726	0.767	0.864	0.828	0.792	0.637	0.537	0.804	1.005	630	6	methanol			158.806	202.28	166.741	185.069				Methanol : Acetone	-	-	-	-			Ethyl acetate	190.654	192.781	196	193.145	2.69156			E	168.245	2.93786
E	0.362	0.599	0.565	0.55	0.659	0.411	0.78	0.775	4.489	4.416	0.053	0.116	630	7	Water			144.949	130.644	126.285	81.2472				Acetone:Water	-	+	-	-			Acetone	138.99	137.237	136.44	137.556	1.30448			M	167.545	2.70802
F	0.039	0.053	0.04	0.046	0.086	0.058	0.043	0.055	0.101	0.079	0.068	0.055	630	8	n- hexan :Ethyl acetate			125.726	81.6942	142.937	123.38				Methanol:Water	-	-	+	-			Ethanol	137.33	134.555	133.567	135.151	1.95091			W	126.35	2.6181
G													630	9	Ethanol : n- hexan			208.091	201.833	171.435	174.676											methanol	205.66	202.28	200.765	202.902	2.50586			H:EA	142.939	2.94
H													630	10	Methanol : Chloroform			130.979	200.939	192.333	147.519											Water	135.33	130.644	128.33	131.435	3.56638			H:E	171.139	2.46483
														11	Methanol : Ethyl acetate			143.608	217.255	193.228	173.223											n- hexan :Ethyl acetate	80	81.6942	85	82.2314	2.54292			M:C	192.814	2.5394
														12	Methanol : Acetone			112.092	172.329	162.606	91.8641											Ethanol : n- hexan	203	201.833	201	201.944	1.00465			M:EA	192.743	2.53504
														13	Acetone:Water			159.589	173	163.277	126.509											Methanol : Chloroform	200	200.939	203.111	201.35	1.59574			M:A	162.975	2.30574
														14	Methanol:Water			145.619	153.107	178.364	134.22											Methanol : Ethyl acetate	217.99	217.255	216.99	217.412	0.518043			A:W	163.199	3.17322
																					500											Methanol : Acetone	170.88	172.329	175.22	172.81	2.20956			M:W	178.302	2.27314
																																Acetone:Water	176.443	173	170.776	173.406	2.8553
																																Methanol:Water	150.44	153.107	155	152.849	2.29091								bc	g	de	a	bc
																																								TAC Roots	Average	Std			H	C	EA	A	E
																																								H	180.642	2.72332		Replica 1	183.44	125.112	139.67	226.998	180.33
																																Extracts of leaves	Replica 1	Replica 2	Replica 3	Average	Std			C	120.676	4.19293		Replica 2	180.487	120.139	142.378	225.637	177.023
																																n- hexan	125.11	122.15	120.56	122.607	2.3091			EA	142.089	2.28871		Replica 3	178	116.778	144.22	224.889	175.322
																																Chloroform	150.55	147.295	145.56	147.802	2.53324			A	225.841	1.06924
																																Ethyl acetate	123	122.374	121	122.125	1.02301			E	177.558	2.54658
																																Acetone	180	184.175	187.56	183.912	3.78688			M	185.39	2.34647
																																Ethanol	171.44	167.635	165.66	168.245	2.93786			W	81.3591	3.08652
																																methanol	170.564	166.741	165.33	167.545	2.70802			H:EA	123.68	3.2903
																																Water	123.765	126.285	129	126.35	2.6181			H:E	175.185	2.92348
																																n- hexan :Ethyl acetate	140	142.937	145.88	142.939	2.94			M:C	148.206	3.05848
																																Ethanol : n- hexan	168.54	171.435	173.443	171.139	2.46483			M:EA	173.331	2.94648
																																Methanol : Chloroform	195.56	192.333	190.55	192.814	2.5394			M:A	92.4347	2.65637
																																Methanol : Ethyl acetate	190	193.228	195	192.743	2.53504			A:W	127.285	2.86345
																																Methanol : Acetone	165.443	162.606	160.876	162.975	2.30574			M:W	133.632	2.71081
																																Acetone:Water	166.332	163.277	159.987	163.199	3.17322
																																Methanol:Water	180.543	178.364	175.998	178.302	2.27314
																																Extracts of roots	Replica 1	Replica 2	Replica 3	Average	Std
																																n- hexan	183.44	180.487	178	180.642	2.72332
																																Chloroform	125.112	120.139	116.778	120.676	4.19293
																																Ethyl acetate	139.67	142.378	144.22	142.089	2.28871
																																Acetone	226.998	225.637	224.889	225.841	1.06924
																																Ethanol	180.33	177.023	175.322	177.558	2.54658
																																methanol	187.88	185.069	183.22	185.39	2.34647
																																Water	78.33	81.2472	84.5	81.3591	3.08652
																																n- hexan :Ethyl acetate	127.11	123.38	120.55	123.68	3.2903
																																Ethanol : n- hexan	178.33	174.676	172.55	175.185	2.92348
																																Methanol : Chloroform	145.55	147.519	151.55	148.206	3.05848
																																Methanol : Ethyl acetate	170.44	173.223	176.33	173.331	2.94648
																																Methanol : Acetone	95.33	91.8641	90.11	92.4347	2.65637
																																Acetone:Water	130.456	126.509	124.889	127.285	2.86345
																																Methanol:Water	130.675	134.22	136	133.632	2.71081
[truncated: 10 more columns]

## Sheet: Reducing power
Read 1
														Average																					Ascarbic Acid Equivilant(AAE) µg/mg extract														f
	1	2	3	4	5	6	7	8	9	10	11	12			1	2	3	4	5	6	7	8	9	10	11	12													WB	WF	WL	WR		TRP Branches	Average	Std		TRP Branches	H
A	1.248	0.851	0.635	0.459	0.66	0.852	1.019	0.989	0.917	0.436	1.02	0.998	630	A	1.2505	0.8535	0.633	0.459	0.662	0.8535	1.02	0.9905	0.919	0.4365	1.022	1							n-Hex		1	n- hexan			84.2668	20.7485	47.9888	61.609		H	84.5393	2.01337		Replica 1	86.675
B	1.262	1.464	1.485	0.834	0.65	0.404	0.163	0.608	0.976	1.287	1.507	0.312	630	B	1.263	1.467	1.487	0.8355	0.65	0.404	0.163	0.609	0.9775	1.289	1.5095	0.312							Chlf		2	Chloroform			58.4267	51.4257	92.668	75.7383		C	58.6189	2.83988		Replica 2	84.2668
C	1.272	1.018	0.856	1.129	1.325	1.279	0.888	0.728	0.377	1.114	1.042	1.382	630	C	1.2745	1.02	0.857	1.131	1.327	1.2815	0.8875	0.728	0.377	1.1155	1.043	1.384							Eth-ac		3	Ethyl acetate			80.5754	82.7393	112.971	110.171		EA	80.9351	2.35569		Replica 3	82.676
D	1.443	0.54	1.403	1.396	1.081	1.593	1.152	1.027	0.864	0.595	0.484	1.222	630	D	1.445	0.539	1.4025	1.398	1.0825	1.595	1.154	1.029	0.8655	0.595	0.484	1.2235							Ace		4	Acetone			108.643	77.5204	141.993	155.741		A	108.996	2.40653
E	0.752	0.731	1.167	0.627	0.894	0.477	1.371	1.053	0.112	0.111	0.121	0.122	630	E	0.753	0.733	1.1685	0.6285	0.8945	0.4775	1.3725	1.055	1.964										Eth		5	Ethanol			108.643	106.352	163.124	130.983		E	108.87	2.01312
F	0.101	0.135	0.091	0.063	0.071	0.076	0.051	0.061	0.061	0.062	0.06	0.101	630																				Mth		6	methanol			159.178	189.282	168.915	146.894		M	159.543	2.63402
G													630																				Water		7	Water			129.837	124.427	132.765	95.8503		W	130.052	3.28578
H													630																				n-Hex:Eac		8	n- hexan :Ethyl acetate			55.5626	39.7149	68.61	80.0025		H:EA	59.3752	9.42572
																																	Eth:n-Hes		9	Ethanol : n- hexan			160.769	109.089	137.793	174.707		H:E	160.966	3.1721
Read 2																																	Meth:Chlf		10	Methanol : Chloroform			130.092	162.233	178.526	113.862		M:C	130.395	2.33876
																																	Mth:Eth-ac		11	Methanol : Ethyl acetate			186.736	143.966	203.03	134.292		M:EA	186.912	3.00386
	1	2	3	4	5	6	7	8	9	10	11	12			1	2	3	4	5	6	7	8	9	10	11	12							Meth:Ace		12	Methanol : Acetone			127.291	129.837	177.953	60.7816		M:A	127.395	2.22933
A	1.253	0.856	0.631	0.459	0.664	0.855	1.021	0.992	0.921	0.437	1.024	1.002	630	A	111.679	76.224	56.5317	40.9922	59.1216	76.224	91.0937	88.4591	82.0736	38.9827	91.2723	89.3075							Ace:Water		13	Acetone:Water			116.981	192.146	183.936	148.74		A:W	116.989	2.00651
B	1.264	1.47	1.489	0.837	0.65	0.404	0.163	0.61	0.979	1.291	1.512	0.312	630	B	112.795	131.014	132.8	74.6164	58.0499	36.0802	14.5571	54.3883	87.2981	115.117	134.81	27.864							Mth:Water		14	Methanol:Water			126.082	164.078	176.171	93.3045		M:W	126.434	3.62285
C	1.277	1.022	0.858	1.133	1.329	1.284	0.887	0.728	0.377	1.117	1.044	1.386	630	C	113.822	91.0937	76.5366	101.007	118.511	114.448	79.2604	65.0159	33.6689	99.6226	93.1478	123.602
D	1.447	0.538	1.402	1.4	1.084	1.597	1.156	1.031	0.867	0.595	0.484	1.225	630	D	129.049	48.1368	125.254	124.852	96.6754	142.446	103.061	91.8975	77.2957	53.138	43.2248	109.268
E	0.754	0.735	1.17	0.63	0.895	0.478	1.374	1.057	0.112	0.111	0.122	0.122	630	E	67.2486	65.4624	104.356	56.1298	79.8856	42.6443	122.575	94.2195	175.4
F	0.101	0.135	0.092	0.063	0.072	0.076	0.051	0.061	0.061	0.061	0.063	0.101	630																							Extracts of branches	Replica 1	Replica 2	Replica 3	Average	Std								i
G													630																							n- hexan	86.675	84.2668	82.676	84.5393	2.01337			TRP Flowers	Average	Std			H
H													630																							Chloroform	61.55	58.4267	55.88	58.6189	2.83988			H	21.4015	2.786		Replica 1	24.456
														Ascarbic Acid Equivilant(AAE) µg/mg extract																						Ethyl acetate	78.78	80.5754	83.45	80.9351	2.35569			C	51.9186	0.93778		Replica 2	20.7485
															1	2	3	4	5	6	7	8	9	10	11	12										Acetone	111.56	108.643	106.786	108.996	2.40653			EA	83.4344	1.35865		Replica 3	19
														A	159.178	108.643	80.5754	58.4267	84.2668	108.643	129.837	126.082	116.981	55.5626	130.092	127.291										Ethanol	110.987	108.643	106.98	108.87	2.01312			A	78.0291	1.77214
														B	160.769	186.736	189.282	106.352	82.7393	51.4257	20.7485	77.5204	124.427	164.078	192.146	39.7149										methanol	162.34	159.178	157.11	159.543	2.63402			E	106.409	2.56248
														C	162.233	129.837	109.089	143.966	168.915	163.124	112.971	92.668	47.9888	141.993	132.765	176.171										Water	126.879	129.837	133.44	130.052	3.28578			M	189.717	2.09913
														D	183.936	68.61	178.526	177.953	137.793	203.03	146.894	130.983	110.171	75.7383	61.609	155.741										n- hexan :Ethyl acetate	70.11	55.5626	52.453	59.3752	9.42572			W	124.142	2.01515
														E	95.8503	93.3045	148.74	80.0025	113.862	60.7816	174.707	134.292	250													Ethanol : n- hexan	157.897	160.769	164.232	160.966	3.1721			H:EA	40.6146	2.83085
																																				Methanol : Chloroform	128.222	130.092	132.87	130.395	2.33876			H:E	108.986	2.0669
														Ascarbic Acid Equivilant(AAE) µg/mg extract																						Methanol : Ethyl acetate	184	186.736	190	186.912	3.00386			M:C	161.969	3.17072
																		WB	WF	WL	WR							Effect of solvents Total Reducing Power in combination								Methanol : Acetone	129.675	127.291	125.22	127.395	2.22933			M:EA	144.135	1.11962
														1	n- hexan			84.2668	20.7485	47.9888	61.609							Solvents	Branches	Flowers	leaves	Roots				Acetone:Water	119	116.981	114.987	116.989	2.00651			M:A	129.874	0.893584
														2	Chloroform			58.4267	51.4257	92.668	75.7383							n- hexan :Ethyl acetate	-	-	-	-				Methanol:Water	130.22	126.082	123	126.434	3.62285			A:W	192.375	2.51784
														3	Ethyl acetate			80.5754	82.7393	112.971	110.171							n- hexan : Ethanol	+	+	-	+												M:W	164.316	0.60134
														4	Acetone			108.643	77.5204	141.993	155.741							Methanol : Chloroform	-	-	+	-
														5	Ethanol			108.643	106.352	163.124	130.983							Methanol : Ethyl acetate	+	-	+	-																	K
														6	methanol			159.178	189.282	168.915	146.894							Methanol : Acetone	-	-	+	-												TRP Leaves	Average	Std			H
														7	Water			129.837	124.427	132.765	95.8503							Acetone:Water	-	+	+	-				Extracts of flowers	Replica 1	Replica 2	Replica 3	Average	Std			H	48.2529	2.62499		Replica 1	45.77
														8	n- hexan :Ethyl acetate			55.5626	39.7149	68.61	80.0025							Methanol:Water	-	-	+	-				n- hexan	24.456	20.7485	19	21.4015	2.786			C	93.036	2.13393		Replica 2	47.9888
														9	Ethanol : n- hexan			160.769	109.089	137.793	174.707															Chloroform	51.33	51.4257	53	51.9186	0.93778			EA	113.204	2.56346		Replica 3	51
														10	Methanol : Chloroform			130.092	162.233	178.526	113.862															Ethyl acetate	82.564	82.7393	85	83.4344	1.35865			A	142.256	2.52231
														11	Methanol : Ethyl acetate			186.736	143.966	203.03	134.292															Acetone	76.567	77.5204	80	78.0291	1.77214			E	163.188	2.65658
														12	Methanol : Acetone			127.291	129.837	177.953	60.7816															Ethanol	109	106.352	103.876	106.409	2.56248			M	169.16	2.18334
														13	Acetone:Water			116.981	192.146	183.936	148.74															methanol	192	189.282	187.87	189.717	2.09913			W	132.922	0.900303
														14	Methanol:Water			126.082	164.078	176.171	93.3045															Water	126	124.427	122	124.142	2.01515			H:EA	69.5333	3.216
																					250															n- hexan :Ethyl acetate	43.786	39.7149	38.343	40.6146	2.83085			H:E	138.48	3.00643
																																				Ethanol : n- hexan	111	109.089	106.87	108.986	2.0669			M:C	178.922	1.36383
																																				Methanol : Chloroform	158.675	162.233	165	161.969	3.17072			M:EA	203.271	2.83573
																																				Methanol : Ethyl acetate	143.11	143.966	145.33	144.135	1.11962			M:A	178.316	2.29962
																																				Methanol : Acetone	130.786	129.837	129	129.874	0.893584			A:W	183.824	2.78287
																																				Acetone:Water	195	192.146	189.98	192.375	2.51784			M:W	176.347	2.11051
																																				Methanol:Water	165	164.078	163.87	164.316	0.60134
																																																	H
																																												TRP Roots	Average	Std			H
																																				Extracts of leaves	Replica 1	Replica 2	Replica 3	Average	Std			H	63.6513	1.7988		Replica 1	65
																																				n- hexan	45.77	47.9888	51	48.2529	2.62499			C	76.3128	2.00278		Replica 2	61.609
																																				Chloroform	95.33	92.668	91.11	93.036	2.13393			EA	110.5	2.35238		Replica 3	64.345
																																				Ethyl acetate	115.876	112.971	110.765	113.204	2.56346			A	155.84	1.33279
																																				Acetone	139.876	141.993	144.9	142.256	2.52231			E	131.511	2.93092
																																				Ethanol	165.876	163.124	160.564	163.188	2.65658			M	147.291	2.18723
																																				methanol	171.456	168.915	167.11	169.16	2.18334			W	95.9468	1.99675
																																				Water	133.89	132.765	132.11	132.922	0.900303			H:EA	80.4408	1.7126
																																				n- hexan :Ethyl acetate	73.11	68.61	66.88	69.5333	3.216			H:E	175.126	2.14583
																																				Ethanol : n- hexan	141.77	137.793	135.876	138.48	3.00643			M:C	114.142	1.95265
																																				Methanol : Chloroform	180.44	178.526	177.8	178.922	1.36383			M:EA	134.506	2.17537
																																				Methanol : Ethyl acetate	206.22	203.03	200.564	203.271	2.83573			M:A	61.0052	2.45465
																																				Methanol : Acetone	180.776	177.953	176.22	178.316	2.29962			A:W	150.176	2.73703
																																				Acetone:Water	186.55	183.936	180.988	183.824	2.78287			M:W	93.2923	2.49977
																																				Methanol:Water	178.54	176.171	174.33	176.347	2.11051
																																				Extracts of roots	Replica 1	Replica 2	Replica 3	Average	Std
																																				n- hexan	65	61.609	64.345	63.6513	1.7988
																																				Chloroform	74.66	75.7383	78.54	76.3128	2.00278
																																				Ethyl acetate	113	110.171	108.33	110.5	2.35238
																																				Acetone	157.22	155.741	154.56	155.84	1.33279
																																				Ethanol	134.67	130.983	128.88	131.511	2.93092
																																				methanol	145.33	146.894	149.65	147.291	2.18723
																																				Water	97.99	95.8503	94	95.9468	1.99675
																																				n- hexan :Ethyl acetate	78.99	80.0025	82.33	80.4408	1.7126
																																				Ethanol : n- hexan	173.22	174.707	177.45	175.126	2.14583
																																				Methanol : Chloroform	116.22	113.862	112.345	114.142	1.95265
																																				Methanol : Ethyl acetate	136.78	134.292	132.445	134.506	2.17537
																																				Methanol : Acetone	63.564	60.7816	58.67	61.0052	2.45465
																																				Acetone:Water	153.332	148.74	148.456	150.176	2.73703
																																				Methanol:Water	90.7865	93.3045	95.786	93.2923	2.49977
[truncated: 14 more columns]

## Sheet: DPPH
Plate 1 read 1
																Average															% inhibition
	1	2	3	4	5	6	7	8	9	10	11	12					1	2	3	4	5	6	7	8	9	10	11	12				1	2	3	4	5	6	7	8	9	10	11	12		6	methanol			WB1
A	0.368	0.348	0.581	0.661	0.592	0.536	0.349	0.478	0.419	0.372	0.461	0.433	515		1.674	A	0.367	0.348	0.577	0.661	0.591	0.535	0.349	0.4755	0.4175	0.372	0.4615	0.432			A	80.7853	81.7801	69.7906	65.3927	69.0576	71.9895	81.7277	75.1047	78.1414	80.5236	75.8377	77.3822		5	Ethanol			WB2
B	0.473	0.529	0.633	0.658	0.65	0.633	0.536	0.533	0.556	0.672	0.53	0.518	515		1.954	B	0.4715	0.5275	0.6325	0.6585	0.6485	0.6325	0.535	0.532	0.5555	0.6725	0.529	0.5155			B	75.3141	72.3822	66.8848	65.5236	66.0471	66.8848	71.9895	72.1466	70.9162	64.7906	72.3037	73.0105		3	Ethyl acetate			WB3
C	0.524	0.608	0.635	0.702	0.675	0.677	0.636	0.644	0.6	0.661	0.585	0.577	515		2.043	C	0.526	0.605	0.634	0.7015	0.672	0.676	0.635	0.6425	0.599	0.659	0.5845	0.574			C	72.4607	68.3246	66.8063	63.2723	64.8168	64.6073	66.7539	66.3613	68.6387	65.4974	69.3979	69.9476		2	Chloroform			WB4
D	0.56	0.605	0.613	0.655	0.648	0.811	0.742	0.686	0.634	0.666	0.571	0.544	515		1.983	D	0.559	0.602	0.613	0.653	0.6475	0.8095	0.7405	0.685	0.634	0.664	0.5705	0.543			D	70.733	68.4817	67.9058	65.8115	66.0995	57.6178	61.2304	64.1361	66.8063	65.2356	70.1309	71.5707		1	n- hexan			WB5
E	0.434	0.28	0.267	0.45	0.529	0.747	0.769	0.544	0.391	0.287	0.237	0.616	515		1.669	E	0.4345	0.28	0.2655	0.4485	0.5305	0.7475	0.7685	0.544	0.3905	0.2865	0.2365	0.615			E	77.2513	85.3403	86.0995	76.5183	72.2251	60.8639	59.7644	71.5183	79.555	85	87.6178	67.801		4	Acetone			WB6
F	0.563	0.492	0.43	0.584	0.582	0.777	0.691	0.563	0.499	0.477	0.386	0.612	515		1.948	F	0.5625	0.491	0.429	0.5825	0.5815	0.7755	0.6905	0.5635	0.4995	0.476	0.3855	0.61			F	70.5497	74.2932	77.5393	69.5026	69.555	59.3979	63.8482	70.4974	73.8482	75.0785	79.8168	68.0628		7	Water			WB7
G	0.688	0.614	0.542	0.605	0.643	0.734	0.686	0.666	0.648	0.604	0.477	0.703	515		2.038	G	0.6865	0.6135	0.5395	0.6055	0.641	0.733	0.6835	0.6655	0.6475	0.6035	0.479	0.702			G	64.0576	67.8796	71.7539	68.2984	66.4398	61.623	64.2147	65.1571	66.0995	68.4031	74.9215	63.2461		14	Methanol:Water			WB8
H	0.687	0.479	0.568	0.624	0.631	0.753	0.792	0.603	0.564	0.47	0.616	0.708	515		1.978	H	0.6855	0.4775	0.5675	0.623	0.6305	0.752	0.791	0.6025	0.5635	0.4685	0.616	0.707			H	64.1099	75	70.288	67.3822	66.9895	60.6283	58.5864	68.4555	70.4974	75.4712	67.7487	62.9843		13	Acetone:Water			WB9
														Average	1.91088																														8	n- hexan :Ethyl acetate			WB10
Plate 1 read 2															0.955438																														10	Methanol : Chloroform			WB11
																																													12	Methanol : Acetone			WB12
	1	2	3	4	5	6	7	8	9	10	11	12																																	9	Ethanol : n- hexan			WB13
A	0.366	0.348	0.573	0.661	0.59	0.534	0.349	0.473	0.416	0.372	0.462	0.431	515																																11	Methanol : Ethyl acetate			WB14
B	0.47	0.526	0.632	0.659	0.647	0.632	0.534	0.531	0.555	0.673	0.528	0.513	515																																6	methanol			WF1
C	0.528	0.602	0.633	0.701	0.669	0.675	0.634	0.641	0.598	0.657	0.584	0.571	515																																5	Ethanol			WF2
D	0.558	0.599	0.613	0.651	0.647	0.808	0.739	0.684	0.634	0.662	0.57	0.542	515																																3	Ethyl acetate			WF3
E	0.435	0.28	0.264	0.447	0.532	0.748	0.768	0.544	0.39	0.286	0.236	0.614	515																																2	Chloroform			WF4
F	0.562	0.49	0.428	0.581	0.581	0.774	0.69	0.564	0.5	0.475	0.385	0.608	515																																1	n- hexan			WF5
G	0.685	0.613	0.537	0.606	0.639	0.732	0.681	0.665	0.647	0.603	0.481	0.701	515																																4	Acetone			WF6
H	0.684	0.476	0.567	0.622	0.63	0.751	0.79	0.602	0.563	0.467	0.616	0.706	515																																7	Water			WF7
																																													14	Methanol:Water			WF8
																																													13	Acetone:Water			WF9
Plate 2 read 1																																													8	n- hexan :Ethyl acetate			WF10
																Average															% inhibition														10	Methanol : Chloroform			WF11
	1	2	3	4	5	6	7	8	9	10	11	12					1	2	3	4	5	6	7	8	9	10	11	12				1	2	3	4	5	6	7	8	9	10	11	12		12	Methanol : Acetone			WF12
A	0.672	0.644	0.638	0.622	0.54	0.515	0.481	0.605	0.485	0.655	0.59	0.62	515			A	0.6715	0.6425	0.6365	0.6205	0.5385	0.5135	0.48	0.6035	0.483	0.654	0.5885	0.617			A	64.8429	66.3613	66.6754	67.5131	71.8063	73.1152	74.8691	68.4031	74.712	65.7592	69.1885	67.6963		9	Ethanol : n- hexan			WF13
B	0.497	0.602	0.593	0.503	0.452	0.685	0.422	0.629	0.576	0.549	0.642	0.47	515			B	0.496	0.6015	0.592	0.5025	0.45	0.6845	0.422	0.627	0.5745	0.5475	0.642	0.4685			B	74.0314	68.5079	69.0052	73.6911	76.4398	64.1623	77.9058	67.1728	69.9215	71.3351	66.3874	75.4712		11	Methanol : Ethyl acetate			WF14
C	0.581	0.545	0.677	0.414	0.502	0.424	0.437	0.567	0.512	0.494	0.569	0.52	515			C	0.5805	0.547	0.677	0.413	0.5015	0.4225	0.436	0.5655	0.5115	0.493	0.5685	0.519			C	69.6073	71.3613	64.555	78.377	73.7435	77.8796	77.1728	70.3927	73.2199	74.1885	70.2356	72.8272		6	methanol			WL1
D	0.401	0.598	0.634	0.314	0.357	0.308	0.266	0.518	0.397	0.375	0.532	0.295	515			D	0.4025	0.5975	0.6335	0.3085	0.356	0.307	0.266	0.517	0.395	0.3735	0.53	0.2955			D	78.9267	68.7173	66.8325	83.8482	81.3613	83.9267	86.0733	72.9319	79.3194	80.445	72.2513	84.5288		5	Ethanol			WL2
E	0.648	0.586	0.525	0.418	0.524	0.576	0.473	0.493	0.581	0.608	0.555	0.466	515			E	0.6465	0.586	0.525	0.4165	0.523	0.5745	0.4725	0.492	0.5805	0.6075	0.5545	0.466			E	66.1518	69.3194	72.5131	78.1937	72.6178	69.9215	75.2618	74.2408	69.6073	68.1937	70.9686	75.6021		3	Ethyl acetate			WL3
F	0.553	0.555	0.633	0.538	0.678	0.462	0.343	0.493	0.477	0.614	0.491	0.699	515			F	0.5525	0.555	0.6325	0.5405	0.6775	0.4625	0.343	0.4925	0.478	0.6125	0.4915	0.6985			F	71.0733	70.9424	66.8848	71.7016	64.5288	75.7853	82.0419	74.2147	74.9738	67.9319	74.267	63.4293		2	Chloroform			WL4
G	0.455	0.508	0.459	0.603	0.596	0.376	0.31	0.442	0.445	0.497	0.53	0.389	515			G	0.454	0.507	0.4595	0.602	0.597	0.3835	0.31	0.441	0.445	0.497	0.5285	0.3885			G	76.2304	73.4555	75.9424	68.4817	68.7435	79.9215	83.7696	76.911	76.7016	73.9791	72.3298	79.6597		1	n- hexan			WL5
H	0.311	0.244	0.577	0.586	0.413	0.38	0.233	0.196	0.178	0.658	0.145	0.47	515			H	0.3105	0.2405	0.569	0.597	0.409	0.3815	0.233	0.196	0.177	0.6565	0.145	0.469			H	83.7435	87.4084	70.2094	68.7435	78.5864	80.0262	87.801	89.7382	90.733	65.6283	92.4084	75.445		4	Acetone			WL6
																																													7	Water			WL7
Plate 2 read 2																																													14	Methanol:Water			WL8
																																													13	Acetone:Water			WL9
	1	2	3	4	5	6	7	8	9	10	11	12																																	8	n- hexan :Ethyl acetate			WL10
A	0.671	0.641	0.635	0.619	0.537	0.512	0.479	0.602	0.481	0.653	0.587	0.614	515																																10	Methanol : Chloroform			WL11
B	0.495	0.601	0.591	0.502	0.448	0.684	0.422	0.625	0.573	0.546	0.642	0.467	515																																12	Methanol : Acetone			WL12
C	0.58	0.549	0.677	0.412	0.501	0.421	0.435	0.564	0.511	0.492	0.568	0.518	515																																9	Ethanol : n- hexan			WL13
D	0.404	0.597	0.633	0.303	0.355	0.306	0.266	0.516	0.393	0.372	0.528	0.296	515							1																									11	Methanol : Ethyl acetate			WL14
E	0.645	0.586	0.525	0.415	0.522	0.573	0.472	0.491	0.58	0.607	0.554	0.466	515																																6	methanol			WR1
F	0.552	0.555	0.632	0.543	0.677	0.463	0.343	0.492	0.479	0.611	0.492	0.698	515																																5	Ethanol			WR2
G	0.453	0.506	0.46	0.601	0.598	0.391	0.31	0.44	0.445	0.497	0.527	0.388	515																																3	Ethyl acetate			WR3
H	0.31	0.237	0.561	0.608	0.405	0.383	0.233	0.196	0.176	0.655	0.145	0.468	515																																2	Chloroform			WR4
																																													1	n- hexan			WR5
Plate 3 read 1																																													4	Acetone			WR6
																Average															% inhibition														7	Water			WR7
	1	2	3	4	5	6	7	8	9	10							1	2	3	4	5	6	7	8								1	2	3	4	5	6	7	8						14	Methanol:Water			WR8
A	1.882	1.12	1.035	1.446	1.392	1.551	1.212	1.705	1.674	0.862			515			A	0.8785	0.1175	0.0285	0.4445	0.3735	0.5475	0.211	0.7							A	54.0052	93.8482	98.5079	76.7277	80.445	71.3351	88.9529	63.3508						13	Acetone:Water			WR9
B	1.518	1.323	1.547	1.794	1.591	1.55	1.651	1.631	1.954	1.35			515			B	0.514	0.322	0.542	0.79	0.5865	0.5605	0.649	0.628							B	73.089	83.1414	71.623	58.6387	69.2932	70.6545	66.0209	67.1204						8	n- hexan :Ethyl acetate			WR10
C	1.187	1.35	1.672	1.444	1.523	1.681	1.87	1.636	2.043	1.762			515			C	0.182	0.343	0.668	0.444	0.5175	0.7305	0.8635	0.6325							C	90.4712	82.0419	65.0262	76.7539	72.9058	61.7539	54.7906	66.8848						10	Methanol : Chloroform			WR11
D	1.417	1.267	1.204	1.414	1.693	1.879	1.666	1.74	1.983	1.546			515			D	0.41	0.267	0.2	0.407	0.693	0.8775	0.6605	0.735							D	78.534	86.0209	89.5288	78.6911	63.7173	54.0576	65.4188	61.5183						12	Methanol : Acetone			WR12
																																													9	Ethanol : n- hexan			WR13
	0.882	0.12	0.035	0.446	0.392	0.551	0.212	0.705	0.674	-0.138																																			11	Methanol : Ethyl acetate			WR14
	0.518	0.323	0.547	0.794	0.591	0.55	0.651	0.631	0.954	0.35
	0.187	0.35	0.672	0.444	0.523	0.681	0.87	0.636	1.043	0.762
	0.417	0.267	0.204	0.414	0.693	0.879	0.666	0.74	0.983	0.546
plate 3 read 2
	1	2	3	4	5	6	7	8	9	10
A	1.875	1.115	1.022	1.443	1.355	1.544	1.21	1.695	1.669	0.856			515
B	1.51	1.321	1.537	1.786	1.582	1.571	1.647	1.625	1.948	1.35			515
C	1.177	1.336	1.664	1.444	1.512	1.78	1.857	1.629	2.038	1.757			515
D	1.403	1.267	1.196	1.4	1.693	1.876	1.655	1.73	1.978	1.543			515
	0.875	0.115	0.022	0.443	0.355	0.544	0.21	0.695	0.669	-0.144
	0.51	0.321	0.537	0.786	0.582	0.571	0.647	0.625	0.948	0.35
	0.177	0.336	0.664	0.444	0.512	0.78	0.857	0.629	1.038	0.757
	0.403	0.267	0.196	0.4	0.693	0.876	0.655	0.73	0.978	0.543
[truncated: 47 more columns]

## Sheet: extraxtion efficiency 
	Branches											% efficiency of different solvent on different parts of Isatis tinctoria								synergitic and antagonastic effect of differetn solvent combinations
S/NO	Solvents	Bottle Weight	Total Weight	total extract	% efficiency				% efficiency			S/NO	Solvents	Branches	Flowers	Leaves	Roots			Solvents	Branches	Flowers	Leaves	Roots
1	n- hexan	8.61	8.693	0.083	2.075	0.10375	H	n- hexan	2.075	0.10375		1	H	2.075	0.105	1.775	0.35			n- hexan :Ethyl acetate	-	-	-	-						Correlations: Branches, Flowers, Leaves, Roots
2	Chloroform	8.514	9.402	0.888	22.2	1.11	C	Chloroform	22.2	1.11		2	C	22.2	7.86	8.59	4.835			n- hexan : Ethanol	+	-	-	-
3	Ethyl acetate	8.74	8.75	0.01	0.25	0.0125	EA	Ethyl acetate	0.25	0.0125		3	EA	0.25	3.454	3.855	0.495			Methanol : Chloroform	+	+	+	+							Branches	Flowers	Leaves
4	Acetone	8.702	9.638	0.936	23.4	1.17	A	Acetone	23.4	1.17		4	A	23.4	8.815	8.315	5.21			Methanol : Ethyl acetate	-	-	-	-						Flowers	0.674
5	Ethanol	8.63	8.727	0.097	2.425	0.12125	E	Ethanol	2.425	0.12125		5	E	2.425	7.87	9.12	1.67			Methanol : Acetone	+	+	+	+							0.008
6	methanol	8.74	9.028	0.288	7.2	0.36	M	methanol	7.2	0.36		6	M	7.2	9.945	11.66	3.16			Acetone:Water	+	+	+	+
7	Water	8.75	8.918	0.168	4.2	0.21	W	Water	4.2	0.21		7	W	4.2	27.359	28.83	10.375			Methanol:Water	+	-	-	-						Leaves	0.632	0.992
8	n- hexan :Ethyl acetate	8.72	8.76	0.04	1	0.05	H-EA	n- hexan :Ethyl acetate	1	0.05		8	H:EA	1	0.82	3.065	0.54														0.015	0
9	n- hexan : Ethanol	8.71	8.863	0.153	3.825	0.19125	HE	n- hexan : Ethanol	3.825	0.19125		9	H:E	3.825	4.035	1.855	1.13
10	Methanol : Chloroform	8.631	9.65	1.019	25.475	1.27375	MC	Methanol : Chloroform	25.475	1.27375		10	M:C	25.475	18.1	18.99	8.28													Roots	0.736	0.957	0.956
11	Methanol : Ethyl acetate	8.51	8.59	0.08	2	0.1	MEA	Methanol : Ethyl acetate	2	0.1		11	M:EA	2	6.545	8.645	1.99														0.003	0	0
12	Methanol : Acetone	8.529	9.603	1.074	26.85	1.3425	MA	Methanol : Acetone	26.85	1.3425		12	M:A	26.85	19.405	20.075	8.615													Cell Contents: Pearson correlation P-Value
13	Acetone:Water	8.684	10.25	1.566	39.15	1.9575	AW	Acetone:Water	39.15	1.9575		13	A:W	39.15	39.975	37.025	13.06
14	Methanol:Water	8.72	9.2	0.48	12	0.6	MW	Methanol:Water	12	0.6		14	M:W	12	22.215	22.775	10.345
	Flowers
S/NO	Solvents	Bottle Weight	Total Weight	total extract	% efficiency
1	n- hexan	8.74	8.761	0.021	0.105	0.00525
2	Chloroform	8.651	10.223	1.572	7.86	0.393
3	Ethyl acetate	8.76	9.4508	0.6908	3.454	0.1727
4	Acetone	8.568	10.331	1.763	8.815	0.44075							H	C	EA	A	E	M	W	H:EA	H:E	M:C	M:EA	M:A	A:W	M:W
5	Ethanol	8.53	10.104	1.574	7.87	0.3935						Branches	2.075	22.2	0.25	23.4	2.425	7.2	4.2	1	3.825	25.475	2	26.85	39.15	12
6	methanol	8.68	10.669	1.989	9.945	0.49725						Flowers	0.105	7.86	3.454	8.815	7.87	9.945	27.359	0.82	4.035	18.1	6.545	19.405	39.975	22.215
7	Water	8.55	14.0218	5.4718	27.359	1.36795						Leaves	1.775	8.59	3.855	8.315	9.12	11.66	28.83	3.065	1.855	18.99	8.645	20.075	37.025	22.775
8	n- hexan :Ethyl acetate	8.63	8.794	0.164	0.82	0.041						Roots	0.35	4.835	0.495	5.21	1.67	3.16	10.375	0.54	1.13	8.28	1.99	8.615	13.06	10.345
9	n- hexan : Ethanol	8.72	9.527	0.807	4.035	0.20175
10	Methanol : Chloroform	8.637	12.257	3.62	18.1	0.905
11	Methanol : Ethyl acetate	8.62	9.929	1.309	6.545	0.32725
12	Methanol : Acetone	8.653	12.534	3.881	19.405	0.97025
13	Acetone:Water	8.692	16.687	7.995	39.975	1.99875
14	Methanol:Water	8.65	13.093	4.443	22.215	1.11075
	Leaves
S/NO	Solvents	Bottle Weight	Total Weight	total extract	% efficiency
1	n- hexan	8.633	8.988	0.355	1.775	0.08875
2	Chloroform	8.506	10.224	1.718	8.59	0.4295
3	Ethyl acetate	8.46	9.231	0.771	3.855	0.19275
4	Acetone	8.605	10.268	1.663	8.315	0.41575
5	Ethanol	8.61	10.434	1.824	9.12	0.456
6	methanol	8.6	10.932	2.332	11.66	0.583
7	Water	8.659	14.425	5.766	28.83	1.4415
8	n- hexan :Ethyl acetate	8.651	9.264	0.613	3.065	0.15325
9	n- hexan : Ethanol	8.62	8.991	0.371	1.855	0.09275
10	Methanol : Chloroform	8.504	12.302	3.798	18.99	0.9495
11	Methanol : Ethyl acetate	8.61	10.339	1.729	8.645	0.43225
12	Methanol : Acetone	8.653	12.668	4.015	20.075	1.00375
13	Acetone:Water	8.66	16.065	7.405	37.025	1.85125
14	Methanol:Water	8.53	13.085	4.555	22.775	1.13875
	Roots
S/NO	Solvents	Bottle Weight	Total Weight	total extract	% efficiency
1	n- hexan	8.584	8.654	0.07	0.35	0.0175
2	Chloroform	8.624	9.591	0.967	4.835	0.24175
3	Ethyl acetate	8.544	8.643	0.099	0.495	0.02475
4	Acetone	8.636	9.678	1.042	5.21	0.2605
5	Ethanol	8.419	8.753	0.334	1.67	0.0835
6	methanol	8.595	9.227	0.632	3.16	0.158
7	Water	8.608	10.683	2.075	10.375	0.51875
8	n- hexan :Ethyl acetate	8.432	8.54	0.108	0.54	0.027
9	n- hexan : Ethanol	8.659	8.885	0.226	1.13	0.0565
10	Methanol : Chloroform	8.614	10.27	1.656	8.28	0.414
11	Methanol : Ethyl acetate	8.633	9.031	0.398	1.99	0.0995
12	Methanol : Acetone	8.708	10.431	1.723	8.615	0.43075
13	Acetone:Water	8.658	11.27	2.612	13.06	0.653
14	Methanol:Water	8.55	10.619	2.069	10.345	0.51725
